# Supplementary material for: Arginine methylation catalyzed by PRMT1 is required for B cell activation and differentiation
Source: PubMed Central journal article supplement (PMC5638811; doi:10.1038/s41467-017-01009-1), 2017-10-12
Supplement: 41467_2017_1009_MOESM1_ESM.pdf [file 41467_2017_1009_MOESM1_ESM.pdf]

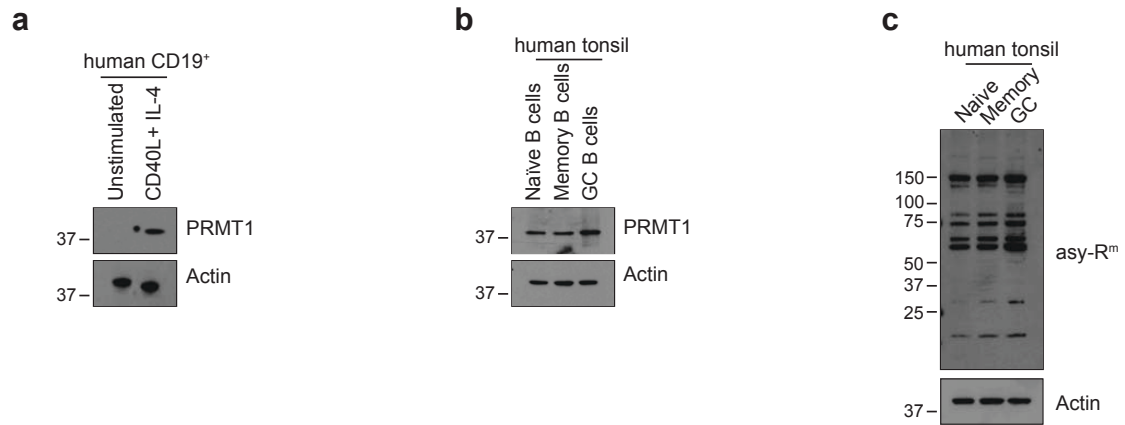

**Supplementary Figure 1: Expression of PRMT1 in activated human B cells. (a)** CD19<sup>+</sup> human B cells, isolated from PBMC of a healthy donor, were activated for three days with CD40L + IL4. Whole-cell lysates were then analyzed with a specific antibody for PRMT1 expression. **(b, c)** Naïve (CD20<sup>+</sup>CD27<sup>-</sup>CD38<sup>lo</sup>), memory (CD20<sup>+</sup>CD27<sup>+</sup>CD38<sup>lo</sup>) and GC (CD20<sup>hi</sup>CD38<sup>hi</sup>CD27<sup>+</sup>) B cells were sorted from human tonsils, lysates prepared and probed for PRMT1 **(b)** and asymmetrically dimethylated arginine-containing proteins **(c)**. **(a-c)** Equal loading was shown with anti-actin antibody. Entire Western blots are presented in Supplementary Fig. 5.

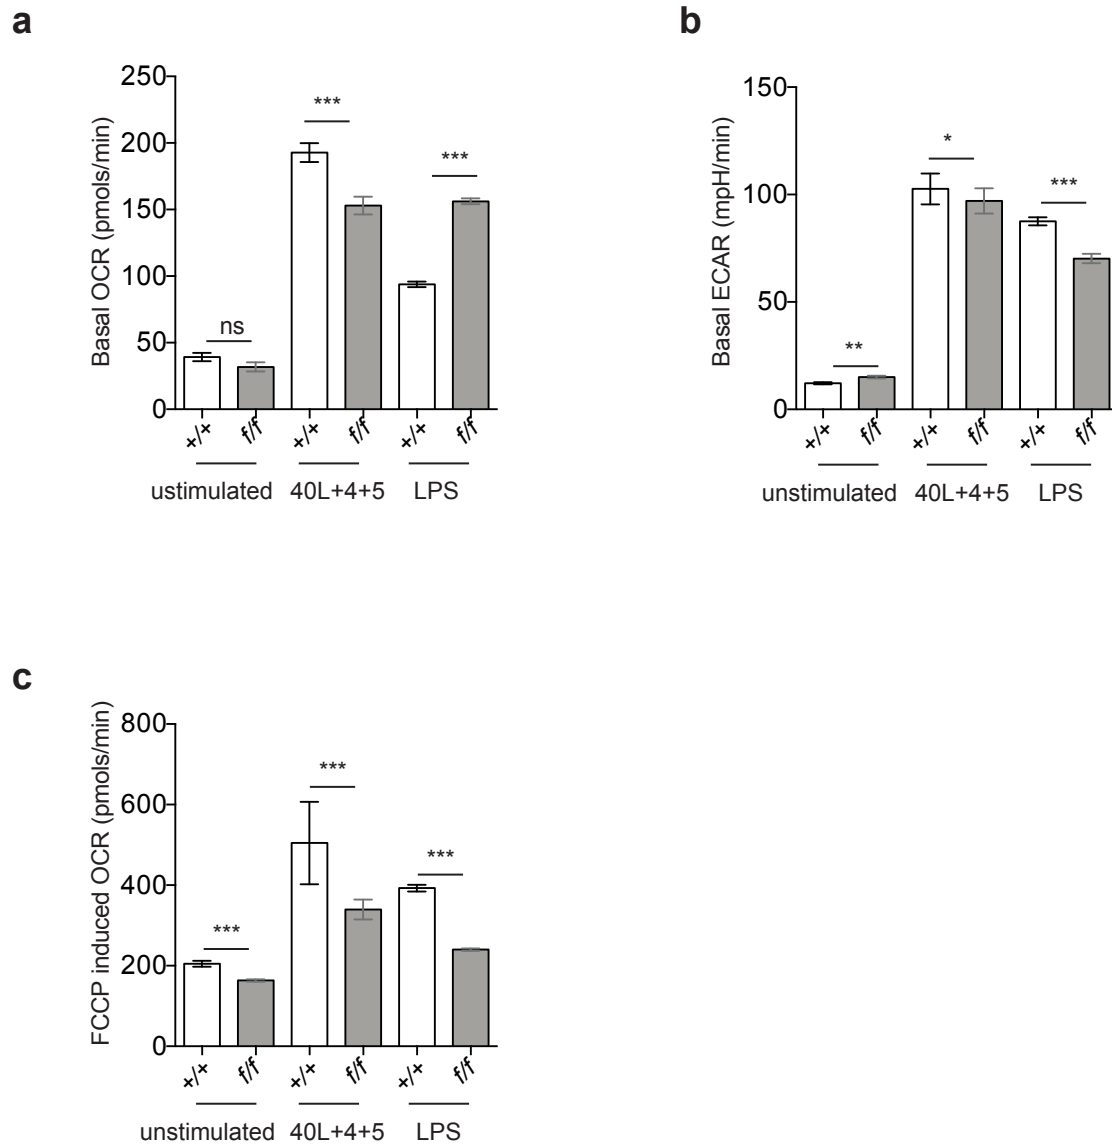

**Supplementary Figure 2:** Metabolic consequences of *Prmt1* deletion in B cells. (a-c) Oxygen-consumption rate (OCR) and glycolytic capacity measured by extracellular acidification rate (ECAR) was determined in naïve and activated B cells. **(a)** Basal OCR, **(b)** basal ECAR and **(c)** maximal respiratory capacity were determined by treatment with the electron transport chain-uncoupler FCCP (FCCP induced OCR) levels are indicated. Naïve and activated B cells were obtained from spleens of control (+/+) and *Prmt1*<sup>f/f</sup>CD23Cre (*f/f*) mice. B cells were activated for 30hr *in vitro* with the indicated stimuli prior to measurements. \*  $p \leq 0.05$ , \*\*  $p \leq 0.01$ , \*\*\*  $p \leq 0.001$ , ns (not significant; unpaired t test). Data are representative of two independent experiments with 4 biological replicates. Mean and s.e.m in a, b and c.

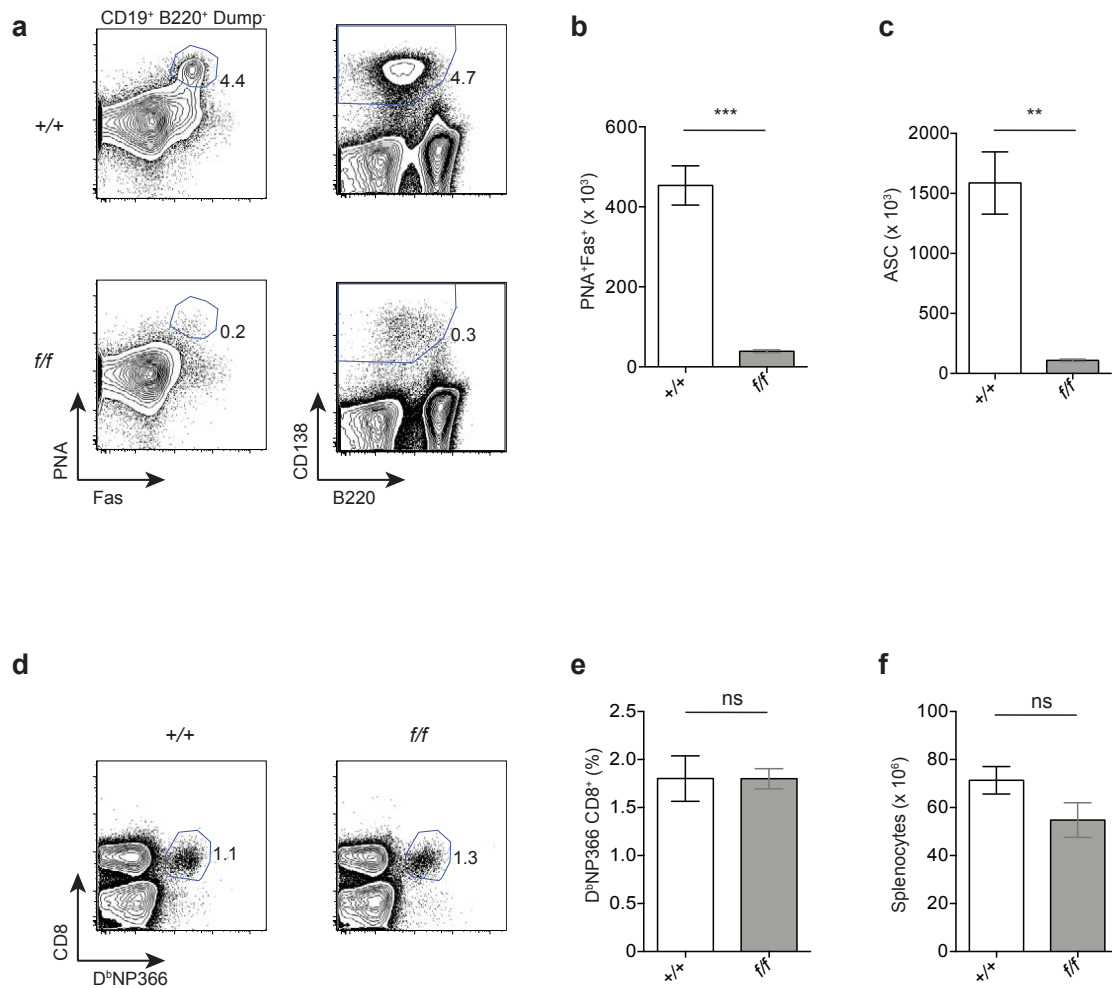

**Supplementary Figure 3.** *Prmt1<sup>ff</sup>/CD23Cre* mice have an impaired immune response to influenza virus infection. **(a-f)** Control (+/+) and *Prmt1<sup>ff</sup>/CD23Cre* (*f/f*) mice were infected intranasally with HKx31 influenza virus. **(a)** Flow cytometric analysis of splenocytes 7 days after infection. Representative dot plots show frequency of (left) GC B cells (CD19<sup>+</sup>B220<sup>+</sup>Dump<sup>-</sup>PNA<sup>+</sup>Fas<sup>+</sup>) and (right) ASC (CD138<sup>+</sup>B220<sup>low</sup>). Numbers indicate percentage of the displayed events within the gated regions. **(b, c)** Graphs depict absolute number of spleen GC B cells **(b)**, and ASC **(c)** at day 7 post-influenza virus infection for indicated strains. **(d-f)** Representative flow cytometric plot of DbNP366-specific splenic CD8<sup>+</sup> T cells, **(e)** percentage of DbNP366-specific CD8<sup>+</sup> T cells and **(f)** total splenocyte number are indicated for (+/+) and (*f/f*) infected mice. \*\*  $p \leq 0.01$ , \*\*\*  $p \leq 0.001$  and ns (not significant; unpaired t test). The experiment comprises at least 5 mice per group. Mean and s.e.m. **(b, c, e, f)**.

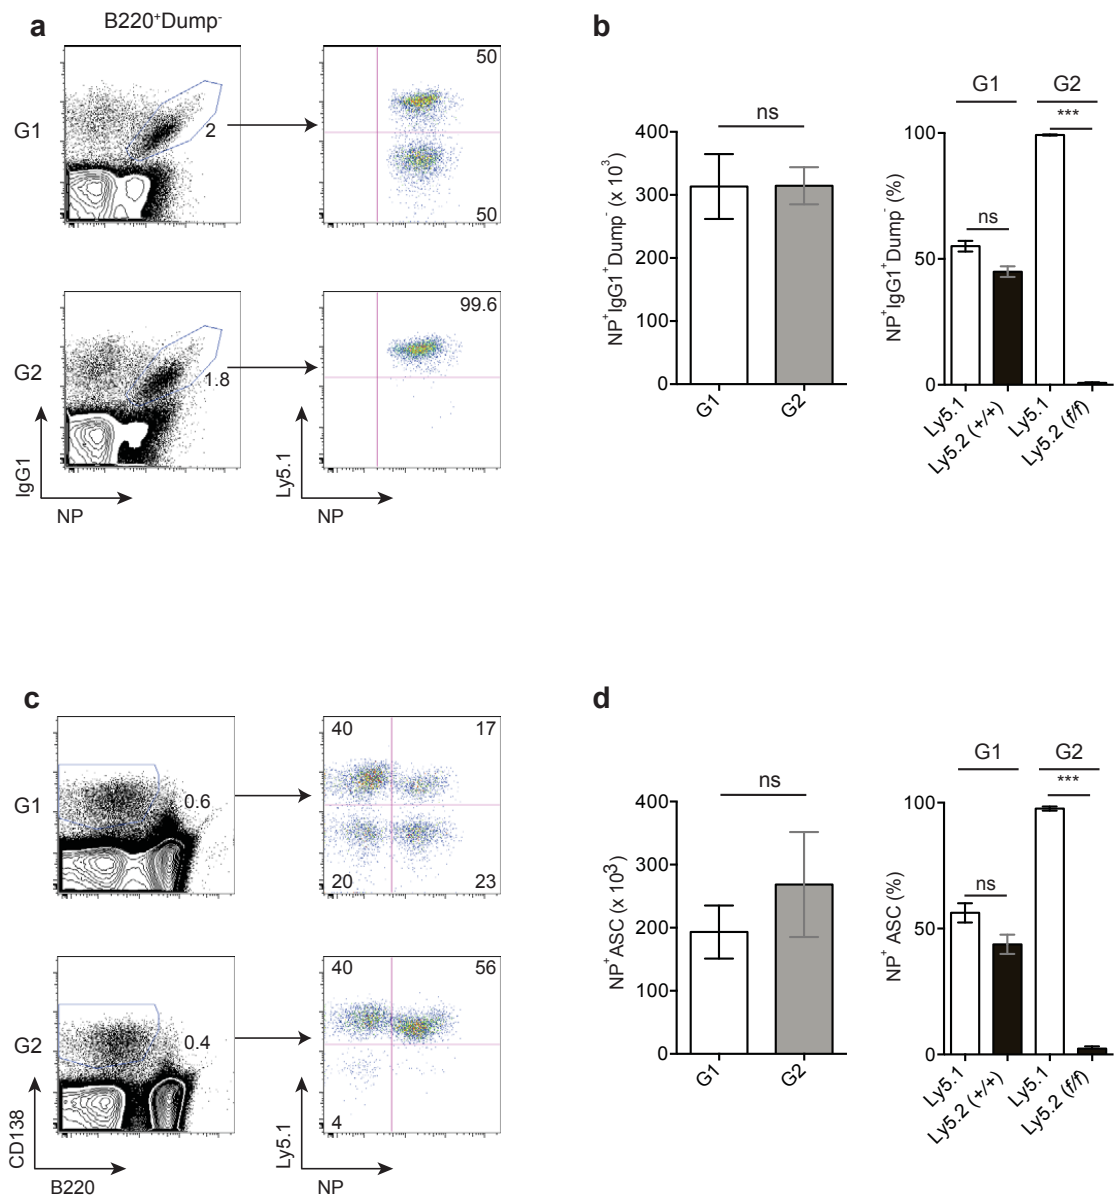

**Supplementary Figure 4.** PRMT1 is intrinsically required for antigen specific B cell expansion. **(a-d)** Irradiation chimeras were generated with (G1) 50% Ly5.1 and 50% CD23Cre (Ly5.2, +/+) or (G2) 50% Ly5.1 and 50% *Prmt1<sup>f/f</sup>CD23Cre* (Ly5.2, f/f) BM cells. Nine weeks post reconstitution, mice were immunized with NP-KLH in alum. **(a, c)** Representative FACS plots of spleens 7 days post NP-KLH immunization revealing proportions of **(a)** antigen-reactive B cells and **(c)** total plasma cells with their allotype composition and NP-binding shown in the adjacent panel. BM donor groups are as indicated and numbers represent percentages of gated events. **(b, d)** Total number of NP-reactive IgG1<sup>+</sup> Dump<sup>-</sup> (IgM<sup>-</sup> IgD<sup>-</sup> Gr1<sup>-</sup>) B cells **(b)** and NP<sup>+</sup> ASC **(d)** found in the spleen at day 7 after immunization in the indicated reconstitution groups. In each group, proportions are subdivided per genotype (Ly5.1<sup>+</sup> and Ly5.2<sup>+</sup>) of the donor cells as indicated. \*\*\*  $p \leq 0.001$ , ns (not significant; unpaired t test). Data are representative of 6 mice per group. Mean and s.e.m in **b** and **d**. Flow cytometry gating strategies for this figure are shown in Supplementary Fig. 12.

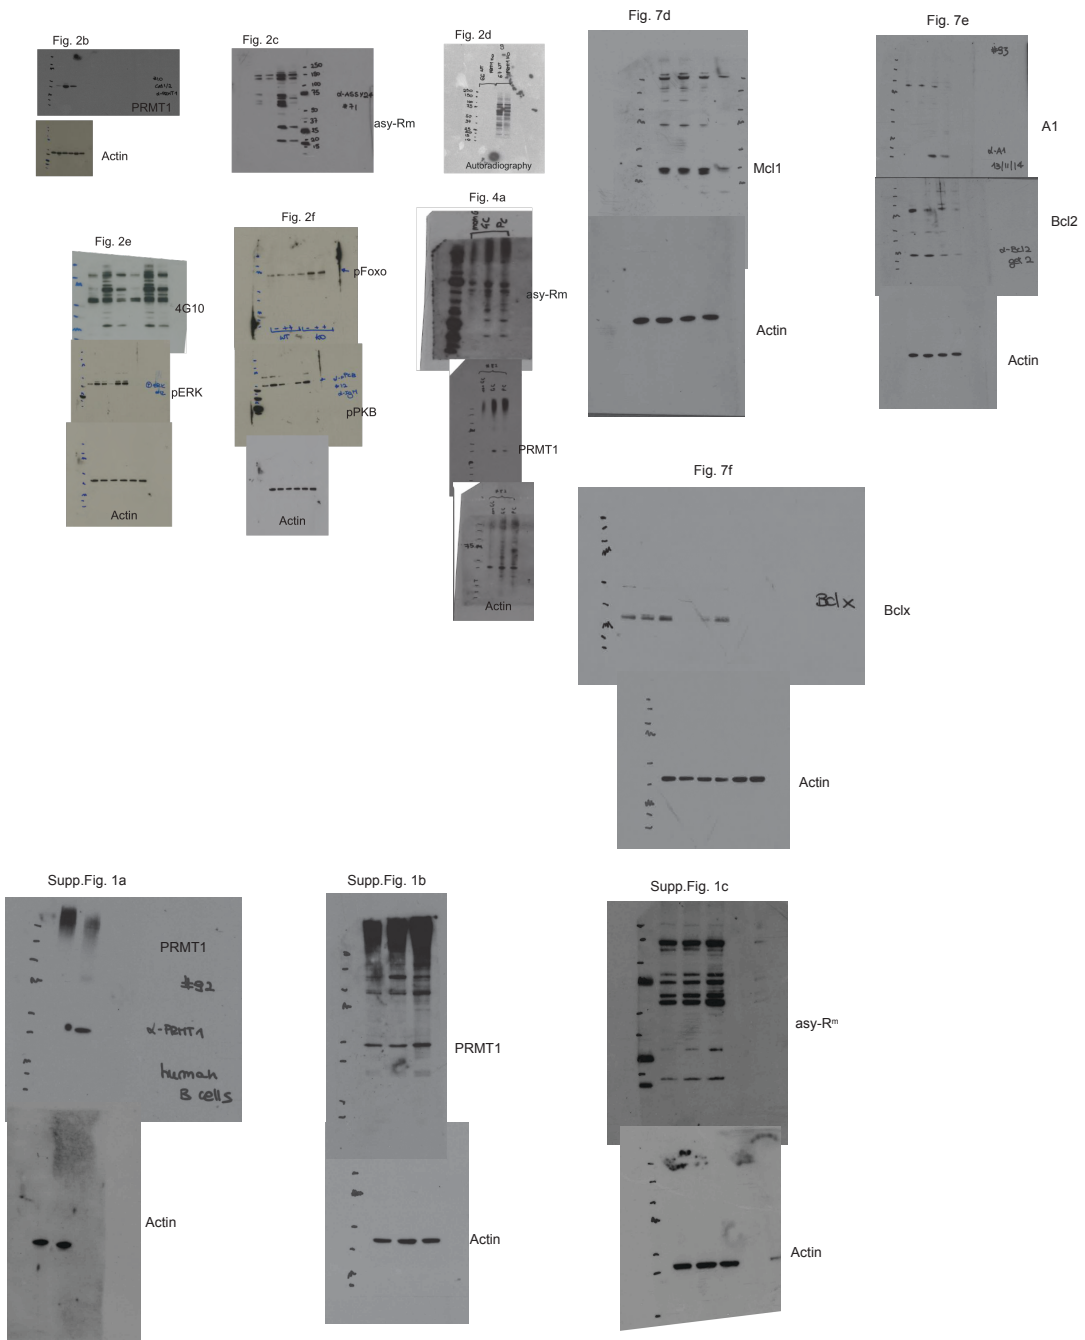

**Supplementary Figure 5.** Original exposures of Western blots and autoradiographs from the indicated figures and supplementary figures, probed for the indicated proteins or modifications.

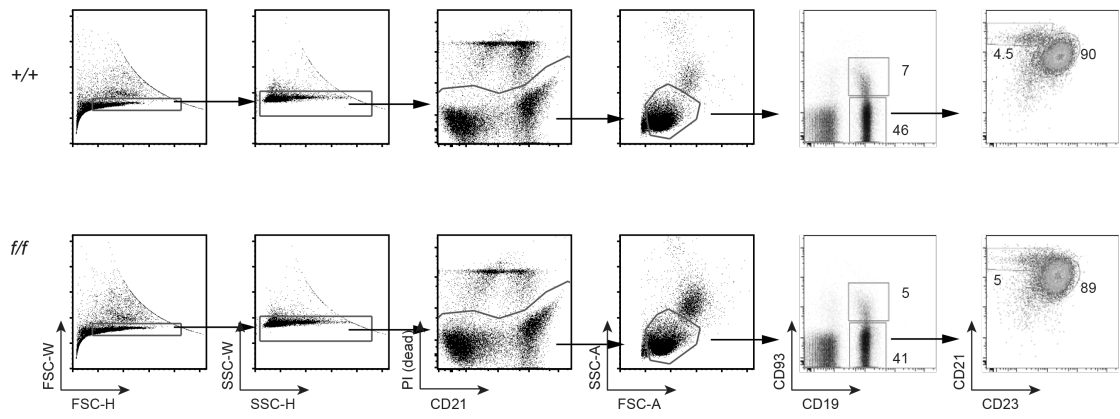

**Supplementary Figure 6.** Gating strategy for flow cytometry plots of Figure 1a.

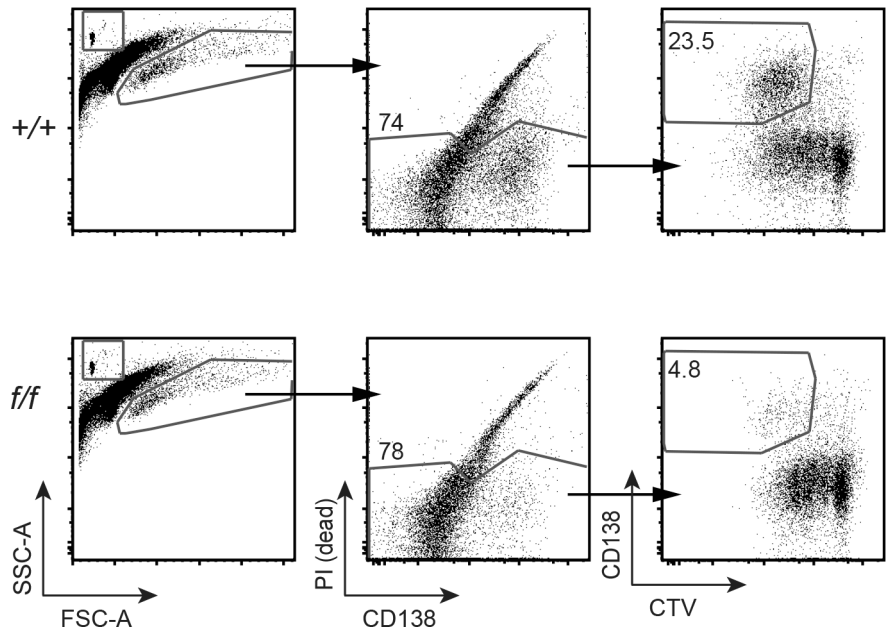

**Supplementary Figure 7.** Gating strategy for flow cytometry plots of Figure 3a.

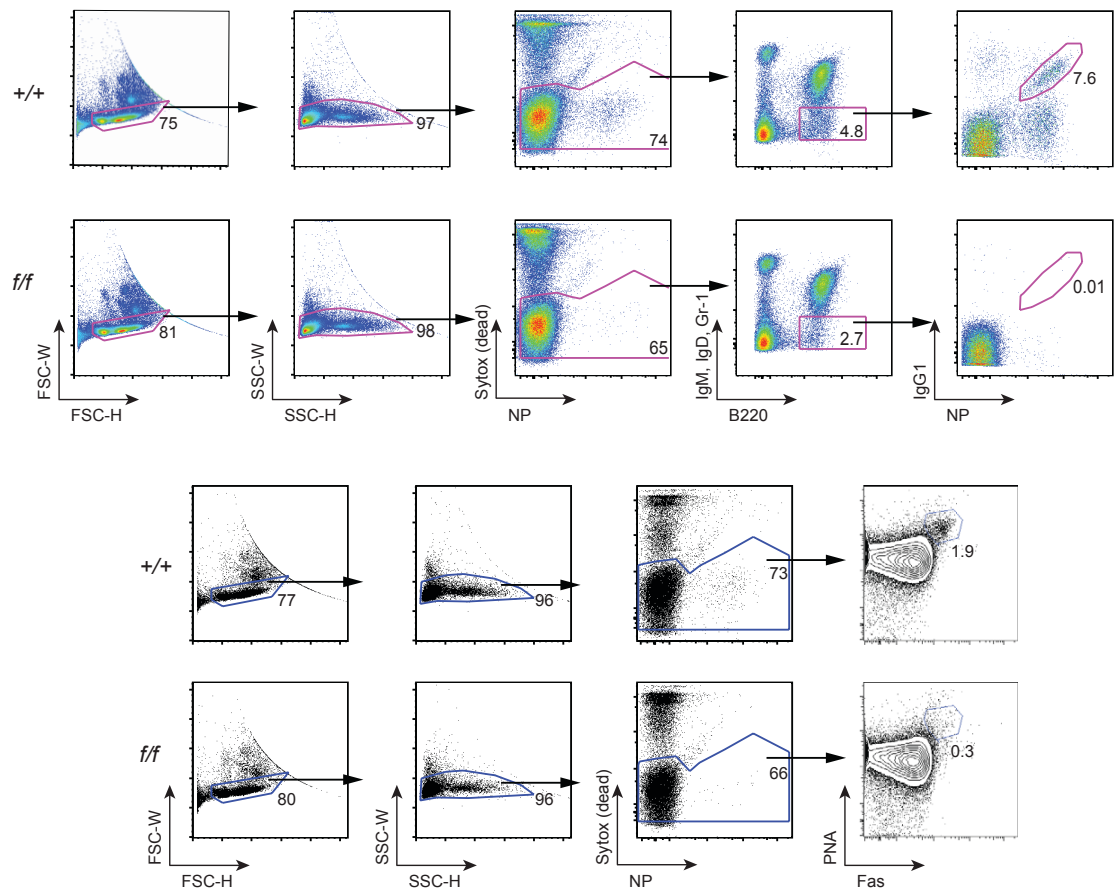

**Supplementary Figure 8.** Gating strategy for flow cytometry plots of Figure 4b NP staining (upper) and total GC staining (lower).



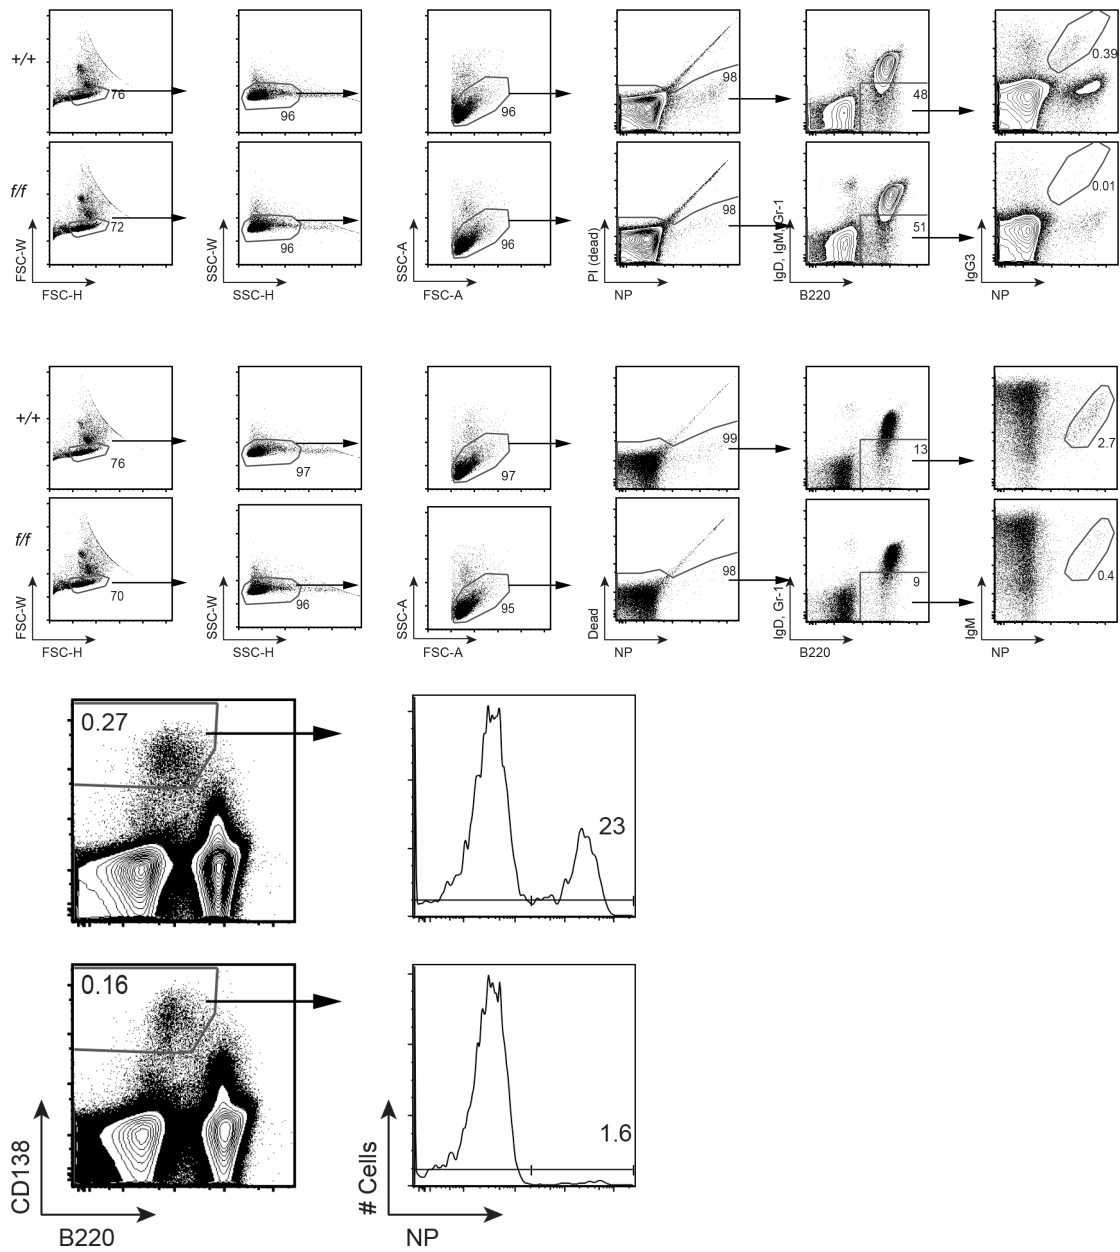

**Supplementary Figure 9.** Gating strategy for flow cytometry plots in Figure 5a (upper), 5b (center) and 5c (lower).

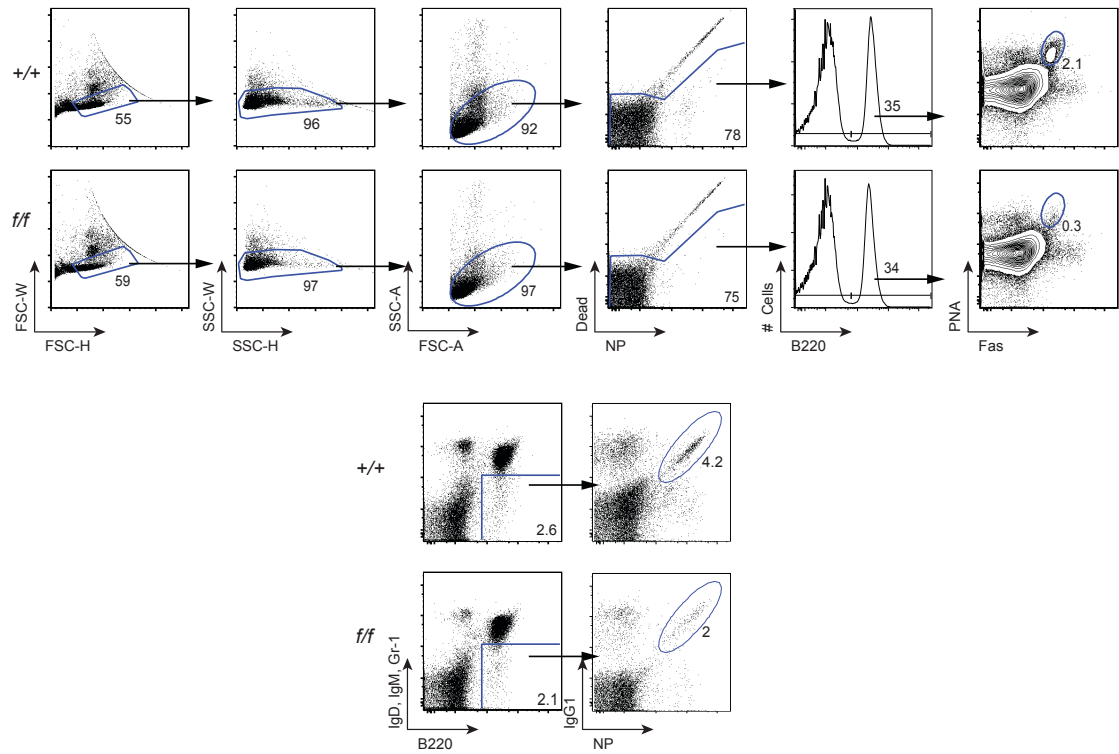

**Supplementary Figure 10.** Gating strategy for flow cytometry plots in Figure 6.

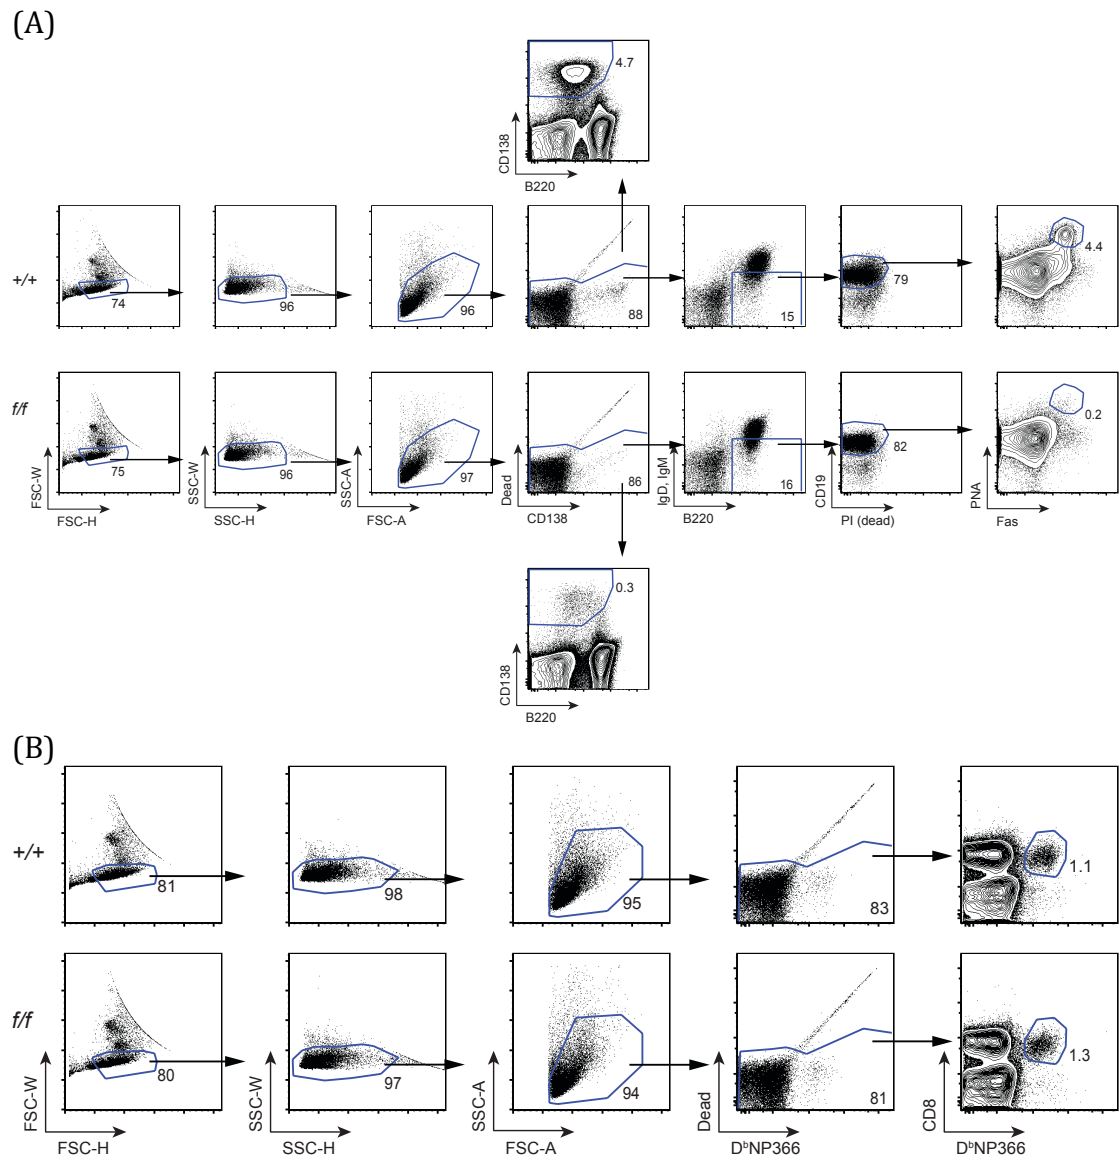

**Supplementary Figure 11.** Gating strategy for flow cytometry plots in (A) Supplementary Figure 3a and (B) Supplementary Figure 3d.

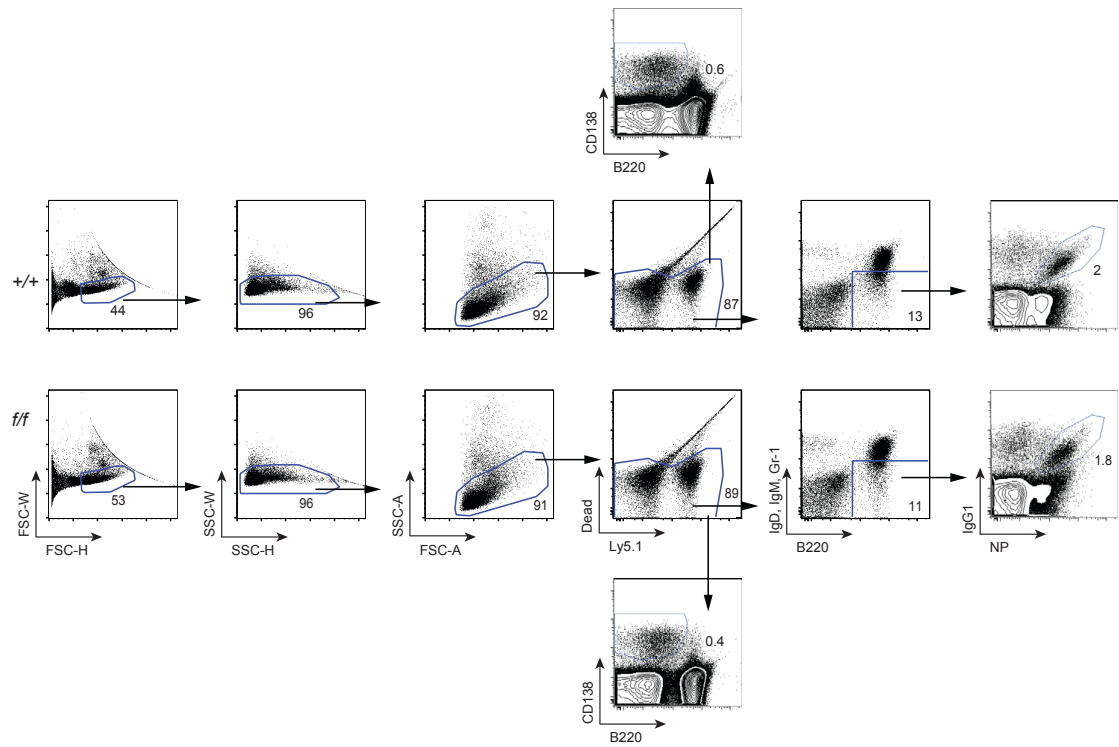

**Supplementary Figure 12.** Gating strategy for flow cytometry plots in Supplementary Figure 4.
